# Supplementary material for: New pyroelectric figures of merit for harvesting dynamic temperature fluctuations
Source: Royal Society of Chemistry journal article supplement (doi:10.1039/d5ta00704f), 2025-01-01
Supplement: d5ta00704f1.pdf [file d5ta00704f1.pdf]

## **Supplementary materials**

### **New pyroelectric figures of merit for harvesting dynamic temperature fluctuations**

**Bastola Narayan<sup>1</sup>, Qingping Wang<sup>1, 2\*</sup>, James Roscow<sup>1</sup>, Chaoying Wan<sup>3</sup>, Chris Bowen<sup>1</sup>**

<sup>1</sup>Centre of Integrated Materials, Processes and Structures (IMPS), Department of Mechanical Engineering, University of Bath, Bath, BA2 2ET

<sup>2</sup>Department of Physics & Mechanical and Electronic Engineering, Hubei University of Education, Wuhan 430205, P. R. China

<sup>3</sup>International Institute for Nanocomposites Manufacturing (IINM), WMG, University of Warwick, CV4 7AL, UK

**\*Corresponding author: [qw608@bath.ac.uk](mailto:qw608@bath.ac.uk)**

We now derive example figures of merit for two specific cases using Ashby's approach [1]. Figure S1 considers a pyroelectric element polarised through its thickness, that has electrodes located on its upper and lower surfaces. The pyroelectric has a thickness ( $t$ ), electrode area ( $A$ ) and is subject to a thermal excitation ( $\Delta T$ ).

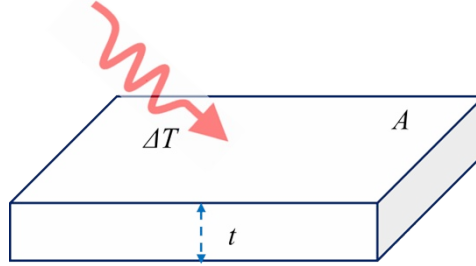

Fig. S1 The pyroelectric material with thickness and electrode area

**CASE 1:** Maximise the power ( $P_{max}$ ) from a specific temperature change ( $\Delta T$ ) for a pyroelectric of element of specified geometry ( $A$ ,  $t$ ) by maximising the operating frequency ( $f_{max}$ ).

We attempt to maximize the output power ( $P_{max}$ ) for a pyroelectric element of specific thickness ( $t$ ), and area ( $A$ ) that is subject to a specific temperature change,  $\Delta T$ ; the thermal frequency ( $f$ ) is a *free variable*,

$P_{max}$  can therefore be written as the *objective function*:

$$P_{max} = E f_{max} \quad (1)$$

According to Eqn. 10 (in the main paper body), the constraint to maintain homogenous heating is given by;

$$f_{max} = \frac{K}{\pi t^2} \quad (2)$$

Based on Eqn. 15 (in the main paper body), the energy for a single thermal cycle is:

$$E = \frac{1}{2} \frac{p^2}{\epsilon_{33}^\sigma} (\Delta T)^2 A t \quad (3)$$

By substituting Eqns. (2) and (3) into (1), we can eliminate the free variable ( $f_{max}$ ) and  $P_{max}$  can be written as:

$$P_{max} = \frac{1}{2} \frac{p^2}{\epsilon_{33}^\sigma} (\Delta T)^2 A t \frac{K}{\pi t^2} = \frac{p^2 K}{\epsilon_{33}^\sigma} (\Delta T)^2 \left( \frac{A}{2\pi t} \right) \quad (4)$$

$$P_{max} = f(\text{materials properties}).f(\text{thermal load}).f(\text{geometry})$$

Since  $\Delta T$ ,  $A$  and  $t$  in Eqn. 4 are constrained to specific values, to maximise the power

there is a need to maximise  $\frac{p^2 K}{\epsilon_{33}^\sigma}$ .

This leads to the first *pyroelectric power figure of merit*  $F_{PI}$ , as defined in Eqn. 21 of the main paper, which is given by:

$$F_{PI} = \frac{p^2 K}{\epsilon_{33}^\sigma} \quad (5)$$

**CASE 2:** We now consider a case where there is a need to maximise the power ( $P_{max}$ ) from a specific temperature change ( $\Delta T$ ) that is fluctuating at a specific frequency ( $f$ ) for a pyroelectric of element of specific area ( $A$ ). In this case the thickness ( $t$ ) of the element can be varied (i.e. it is a free variable).

$P_{max}$  can therefore be written as the *objective function*:

$$P_{max} = E_{max} f \quad (6)$$

To maximize the output power ( $P_{max}$ ) with variable  $t$ , there are constraints on  $A$  and  $\Delta T$  and  $f$ . According to Eqn. (2), the maximum thickness that can maintain homogeneous heating is given by:

$$t_{max} = \left( \frac{K}{\pi f} \right)^{1/2} \quad (7)$$

Based on Eqn. 15 (in the main paper body), the energy for a single cycle is

$$E = \frac{1}{2} \frac{p^2}{\epsilon_{33}^\sigma} (\Delta T)^2 A t \quad (8)$$

Substitute Eqn. (7) and (8) into (6) to eliminate the free variable ( $t_{max}$ ), the power  $P_{max}$  can be written as:

$$P_{max} = \frac{1}{2} \frac{p^2}{\epsilon_{33}^\sigma} (\Delta T)^2 A t f = \frac{p^2 K^{1/2}}{\epsilon_{33}^\sigma} (f)^{1/2} (\Delta T)^2 \frac{A}{2\pi^{1/2}} \quad (9)$$

$$P_{max} = f(\text{materials properties}). f(\text{thermal load}). f(\text{geometry})$$

Since the constraints  $\Delta T$ ,  $f$ , and  $A$  are fixed in Eqn. 7, to maximise the power, there is a

need to maximise  $\frac{p^2 K^{0.5}}{\epsilon_{33}^\sigma}$ .

This leads to the *third pyroelectric power figure of merit*  $F_{P3}$ :

$$F_{P3} = \frac{p^2 K^{0.5}}{\epsilon_{33}^\sigma} \quad (10)$$

## References:

- [1] Michael F. Ashby. Materials Selection in Mechanical Design, Pergamon Press, Oxford, U.K, 1992.
